January 2012

# PSYCHIATRIC SERVICES

A Journal of the  
American Psychiatric  
Association

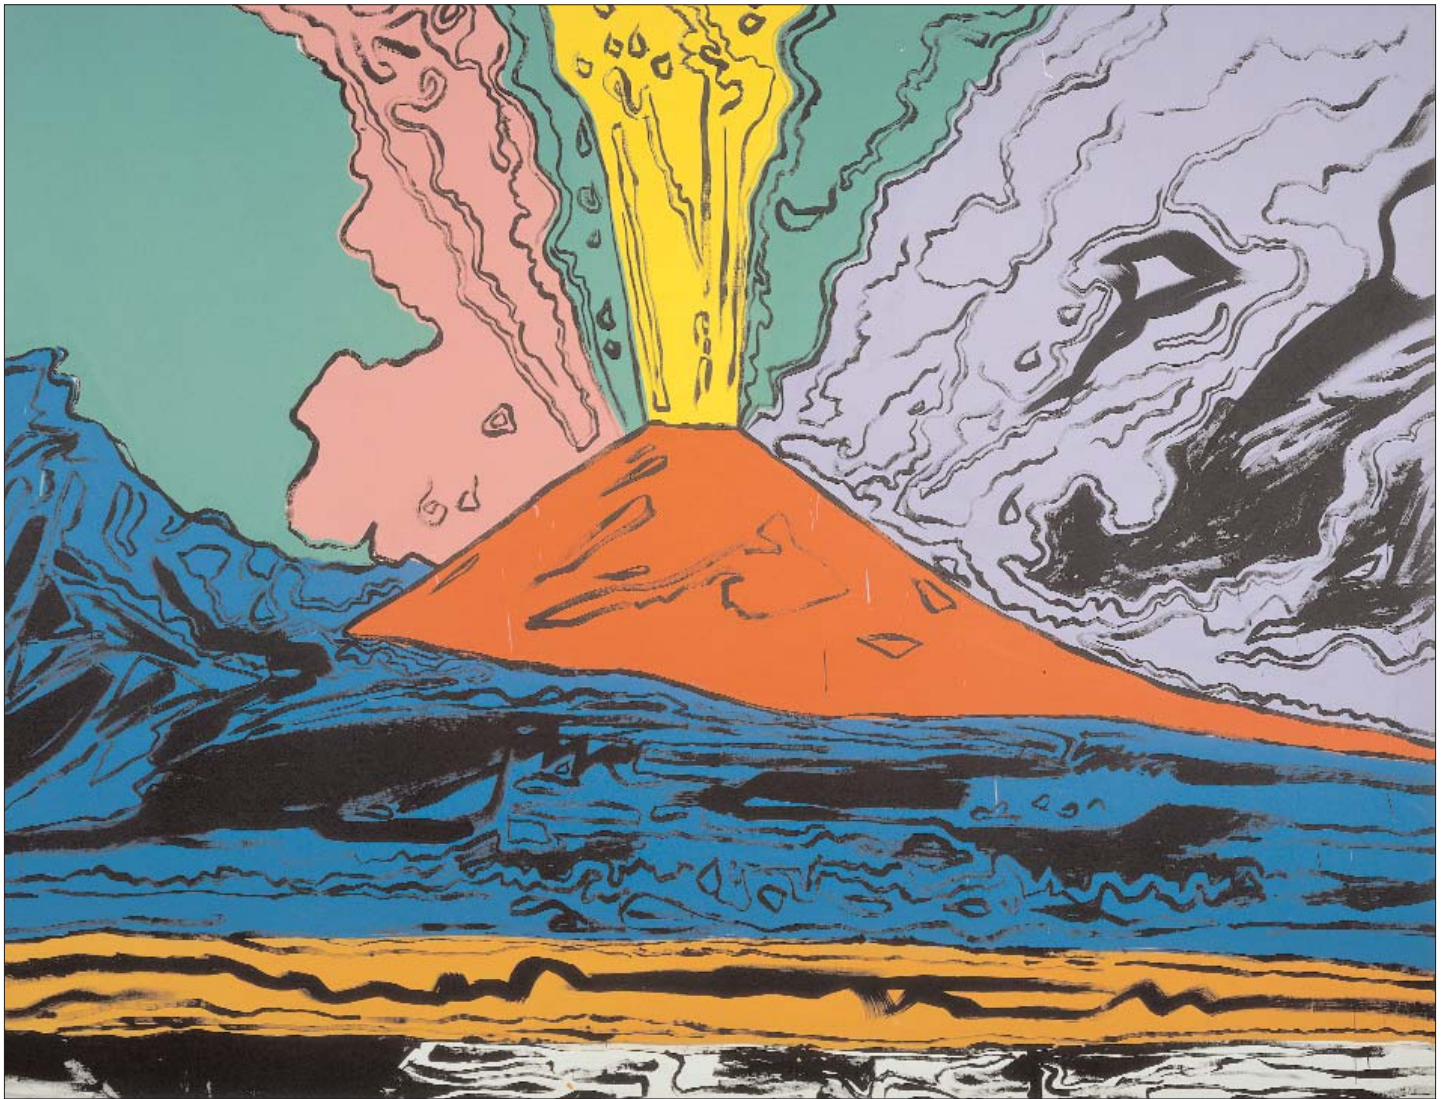

◆ Examining Trends in Medication Spending: U.S. Data, 1986–2008

◆ Focus on Recovery From Serious Mental Illnesses: Four New Investigations

◆ PSAs and Stigma Reduction: Where Is the Evidence to Support Their Effectiveness?
